# Supplementary material for: Comprehensive analysis and prognostic assessment of senescence-associated genes in bladder cancer
Source: Discov Oncol. 2024 Apr 26;15:130. doi: 10.1007/s12672-024-00987-1 (PMC11052743; doi:10.1007/s12672-024-00987-1)
Supplement: Supplementary file 2 — (TXT 11 KB) [file 12672_2024_987_MOESM2_ESM.txt]

Table S2: 115 Differentially expressed genes (DEGs) between BLCA tissue and normal bladder tissue.
gene	conMean	treatMean	logFC	pValue	fdr
E2F1	3.82913574736842	15.3603770869565	2.00412292224527	1.84953510230211e-08	1.26138293977004e-07
E2F3	3.73029578947368	10.3117536859903	1.46692777100902	1.22716956246087e-06	4.49962172902319e-06
ABL1	33.63902	13.252491205314	-1.34387209320717	4.5814447790823e-06	1.51676958220103e-05
AKT3	7.58419326315789	2.56405274251208	-1.56456978951268	4.4198610213048e-06	1.47762020418131e-05
ARG2	10.9871933263158	3.89895290724638	-1.49466426290052	0.00818141997348053	0.0132850676712231
BCL2	3.34940326315789	1.29752836147343	-1.36813801136787	5.60703534233827e-10	1.13818385813708e-08
BRCA2	0.319119140526316	1.24468017543478	1.96360803670204	8.86477053226298e-09	7.95178099271758e-08
CALR	192.359804210526	451.97650089372	1.23244040325885	7.49257534456704e-11	2.32269835681578e-09
CDK1	2.77573871578947	15.8116229130435	2.51004177775563	5.34224172385751e-11	1.91562623540018e-09
CDK2	7.40663973684211	17.0403993743961	1.20206807776543	2.94126030812487e-08	1.79101743762604e-07
CDKN1A	211.68087	83.0379748502415	-1.35004773171114	0.000255270020853772	0.000576470709345273
CDKN2A	0.859437035263158	15.6964051272947	4.19089842542535	0.00233583357663941	0.00423680451932999
CGAS	1.57774956315789	3.7227515842029	1.23850112574282	0.000628963752088973	0.00128429125426551
CHEK1	1.2285712	3.95118705748792	1.68530467879476	2.59290555414637e-09	3.11959597047713e-08
CHEK2	2.37681506315789	4.85351366618357	1.02999990074552	1.83894188318379e-07	8.70943308563434e-07
ECRG4	15.6742535789474	0.786375971275362	-4.31703369313661	5.24924919341083e-12	1.73722312639988e-09
EEF1E1	3.62893810526316	7.77160448309179	1.09866502974431	1.50703145915255e-09	2.33589876168645e-08
FBXO5	1.22287948421053	2.96867929637681	1.27953901668283	5.80968033679524e-07	2.44009160946798e-06
FOXM1	2.66019331052632	13.4369132113527	2.33659876153639	3.04332610287597e-09	3.34765871316357e-08
H2AX	18.5646881578947	58.6132472705314	1.65866568564473	1.2217886505694e-09	1.98395204687698e-08
HLA-G	1.62666756315789	4.1883439805314	1.36446049070028	0.0121545608586665	0.019012409416538
HMGA1	67.7510121052632	166.382752857488	1.29619148868951	7.20716479319606e-06	2.29686279857931e-05
HMGA2	0.0199754334842105	1.3656081137971	6.09517291386452	0.000246873096985468	0.00056499145014795
MIF	26.5982502631579	62.3410003019324	1.22884996139963	2.27240125415933e-07	1.01959056272149e-06
PRELP	42.8380561578947	3.96298036601932	-3.43423529226241	1.98707402883181e-10	4.83994459879748e-09
RBL1	1.33108696842105	3.43310222995169	1.3669079832824	9.79398245437356e-09	7.95178099271758e-08
ROMO1	62.6710968421053	130.709642922705	1.06049343000926	1.19887969428993e-07	6.10176083213233e-07
SRF	45.7377721052632	16.5969764879227	-1.46246564733753	2.16874295935669e-11	1.73722312639988e-09
TERT	0.0568990128947368	0.62804404113285	3.46439020115675	6.55944376762233e-09	6.21325090210893e-08
TP63	10.5906140889474	21.2201290342512	1.00264718358033	0.0108654373559019	0.0172330890156398
CRYAB	72.9753636842105	7.16830222652174	-3.34770612563617	1.69492887873292e-10	4.5007404993686e-09
EDNRA	9.71346868421053	2.79265835567633	-1.79834748471801	9.40501533555814e-07	3.56345581047258e-06
MSH2	4.75192973684211	10.490585668599	1.1425098135887	1.34180060369881e-07	6.72873538031315e-07
RAD54B	0.304857244736842	0.960117832487923	1.65507764337032	2.65302883119756e-09	3.11959597047713e-08
RAD54L	0.745080592631579	4.10291487077295	2.46118083066644	1.71582482380621e-10	4.5007404993686e-09
ANAPC11	13.0798446315789	26.3880032077295	1.01253678145954	1.36268540979112e-08	1.05608119258812e-07
CBX2	1.00552665894737	5.04903456099034	2.32805622127961	2.47678515387452e-08	1.56404395828002e-07
CBX6	16.6001597368421	7.91654112391304	-1.06825498989205	2.09054417024017e-05	6.04131832247371e-05
CBX8	1.02993365263158	3.36441645917874	1.70780489513149	2.28278891993717e-11	1.73722312639988e-09
CCNA2	3.35787154736842	13.9132919115942	2.05084485736252	5.80165039459967e-09	5.81871407223085e-08
CCNE1	2.27116299473684	11.6210395900966	2.35523598164107	6.39089403655093e-10	1.2107193702577e-08
CCNE2	0.323155370526316	1.54202780398551	2.25452890531559	9.6862364704049e-09	7.95178099271758e-08
E2F2	0.710091082105263	2.51397783888889	1.82389593873436	8.06890468899007e-07	3.12670056698365e-06
ETS2	131.423482631579	53.2403332898551	-1.303631570359	4.94663950953602e-05	0.000129754159442445
EZH2	1.92729932526316	7.50868055555556	1.96197876465866	1.8143347458061e-09	2.57786728466617e-08
FOS	917.617895789474	120.900680057971	-2.92407116803419	2.24474669040032e-10	5.10305747617673e-09
H1-2	21.7542362105263	134.950567449275	2.63306277318514	9.4741901629251e-09	7.95178099271758e-08
H1-3	0.0696345836842105	3.14881351135266	5.49886051441151	2.08938784212918e-08	1.37015625801164e-07
H1-4	0.244417478421053	6.96948790082126	4.83363329281515	4.00736679810893e-08	2.31612216636465e-07
H1-5	0.0480491136842105	3.75349965328502	6.28758272027172	1.71707134183613e-07	8.36459039380172e-07
H2AC14	0.131236756315789	0.759515859202899	2.53290824812911	0.000384817684555712	0.000825300820336464
H2AC20	1.43559171052632	6.26176981280193	2.12492497713516	1.80210447705844e-07	8.65517784052011e-07
H2AC4	0.03367939	1.06122349963768	4.97771870912088	5.28520023583231e-05	0.000136309562939402
H2AC6	8.84079378947368	27.6494551376812	1.64500323489145	1.15329836382174e-05	3.54301569426318e-05
H2AC7	0.15257662	4.22520601864734	4.79141587451365	4.47796034204111e-11	1.90873059579502e-09
H2AC8	0.748425689473684	10.0100536819807	3.74144682138679	2.90738736474695e-09	3.3047303045957e-08
H2BC10	0.0279467915789474	1.9750994926087	6.14309885394013	5.93922591160828e-07	2.44009160946798e-06
H2BC11	0.602201697368421	6.33555230898551	3.39515171386339	2.39274450388714e-09	3.11959597047713e-08
H2BC12	16.3951208421053	73.5389915777778	2.16524285803402	2.03432060921452e-07	9.37436929381285e-07
H2BC13	0.105379488947368	1.22948325108696	3.54438608822768	1.98033315255243e-05	5.77174021384939e-05
H2BC14	0.00624995421052632	0.553199810966184	6.46781123318358	7.17478667030201e-07	2.81218649950918e-06
H2BC17	0.0668909657894737	2.83549347951691	5.40564465304007	1.5882329289604e-09	2.35472795119781e-08
H2BC21	4.38892015789474	18.2410577009662	2.05525145565275	8.30463459117608e-07	3.18188808493376e-06
H2BC4	0.742139763157895	6.41484122439614	3.11165074471118	8.89130673308991e-08	4.9411180934245e-07
H2BC5	4.7512688	26.4077419541063	2.47457621258152	2.56334362041572e-09	3.11959597047713e-08
H2BC6	0.0826613331578947	1.82261780876812	4.46265562738058	2.65140672593434e-09	3.11959597047713e-08
H2BC7	0.109700576315789	2.97881134574879	4.76309374751325	9.33937800716988e-09	7.95178099271758e-08
H2BC8	0.471620085789474	6.66184457871981	3.82022462867246	1.77077394324391e-08	1.25798732217953e-07
H2BC9	0.595834012105263	8.80409398845411	3.88519216217601	2.62568263024458e-08	1.62792323075164e-07
H2BU1	0.141976772631579	1.12302362431401	2.98366144753091	1.15569750030392e-08	9.16494994427062e-08
H3C1	0.119068474210526	1.11971653835749	3.2332701671456	0.000292636809262998	0.000643800980378596
H3C10	0.780183310526316	6.70211021690821	3.10273036995237	8.6191779397865e-08	4.89856612911199e-07
H3C11	0.0224798310526316	0.812791403502415	5.17618204538523	1.67163949718961e-05	4.95677450905789e-05
H3C13	0.0615530126315789	0.708622702463768	3.5251163120961	2.1297436660425e-06	7.6446588433736e-06
H3C4	0.404711483684211	5.80291621137681	3.84181240673159	2.34199311900122e-11	1.73722312639988e-09
H3C6	0.554463243157895	1.9584483107971	1.82054732325102	0.000116307064300425	0.000281281623591808
H3C7	0.0501706284210526	2.47957250809179	5.62710459433648	3.35740639532764e-06	1.169237535889e-05
H3C8	0.0542936442105263	1.2620443169686	4.53883544017423	1.0129033727923e-09	1.72700025061087e-08
H4-16	0.265824644736842	0.853776901328502	1.68338426764362	0.000206209863304663	0.000475118671533041
H4C1	0.0217148926315789	0.949404494130435	5.45026615439536	0.000277786530230142	0.0006150987455096
H4C12	0.148779835789474	0.652537103140097	2.13288092492419	0.000305273029417637	0.000667295532252655
H4C2	0.0301896042105263	1.96298829321256	6.02285591565642	9.73499279694726e-06	3.01784776705365e-05
H4C3	0.0755928594736842	2.86876754253623	5.24603729698445	3.36027209727631e-06	1.169237535889e-05
H4C4	0.139077917368421	3.93792630951691	4.82347084059568	1.05745907617621e-07	5.54759299963212e-07
H4C5	0.222999376315789	7.32804033181159	5.03831586337387	4.7899022978881e-09	4.9495657078177e-08
H4C8	1.57591044736842	7.91981530140097	2.32928123091335	0.00563615900268096	0.0094212265682069
H4C9	2.26692647894737	10.270251197343	2.17966196117675	1.4082042544526e-08	1.0671058905963e-07
IL6	48.1763002052632	5.19075940948309	-3.21430607739183	3.1359317591295e-08	1.87605742081256e-07
JUN	257.587907368421	68.3544372173913	-1.9139579684844	1.60550654788411e-08	1.19016898440974e-07
KDM6B	19.8578413684211	9.09289513888889	-1.12689718371964	0.000249728171209729	0.000567715375883451
LMNB1	6.02667798947368	21.0696857922705	1.80573391217	4.23167514509299e-09	4.50937882648972e-08
MOV10	6.81933010526316	13.9418041256039	1.03171533520385	9.65827819405641e-08	5.14605135027068e-07
RPS6KA2	9.26744978947368	3.26379421352657	-1.50562229724751	7.19560123608483e-10	1.29142106394996e-08
TFDP1	15.9226818421053	33.4385310024155	1.07042812127006	2.1610220823013e-07	9.82544706752991e-07
UBE2C	10.4487012621053	69.9086246915459	2.74214682181783	5.61767224457532e-11	1.91562623540018e-09
UBE2S	7.12969215789474	20.1362938405797	1.49788648321774	6.13620799554046e-09	5.97841978994085e-08
ENO1	204.259184210526	433.518348067633	1.0856921063551	1.95387420717197e-07	9.12700143350194e-07
EIF2AK1	17.0077080526316	37.337901352657	1.13445210295984	3.566147180293e-11	1.73722312639988e-09
HAAO	7.89200552631579	1.79075974792271	-2.13982017097869	3.47678747565868e-11	1.73722312639988e-09
TDO2	0.221069644105263	1.20593177350483	2.44757544594531	1.45595539630435e-07	7.19537377014179e-07
NAMPT	37.2040713684211	16.9176386857488	-1.13693229363247	0.00791348717407282	0.0129114790734872
SLC2A4	13.3859801684211	0.607789367862319	-4.46100753398177	3.02311756805082e-11	1.73722312639988e-09
IGFBP5	130.120966315789	45.7085556816425	-1.50931730351643	3.48978379022783e-08	2.05175219390981e-07
PTGDS	77.6311544210526	16.4002837001932	-2.24291496993357	1.67705255013559e-08	1.2167551480771e-07
PTGER3	1.62396561052632	0.451063586743961	-1.84811835135898	3.40133752595992e-06	1.17157181449731e-05
PTGER4	9.72908721052632	4.82985300567633	-1.01032517476273	0.000150629698656186	0.000351813200286023
PTGIS	54.2120637368421	6.36087230664251	-3.09131739818765	2.19962826284473e-08	1.41523252383029e-07
PTGS1	108.338497789474	6.78574990292271	-3.99689392282729	8.38618492366459e-09	7.72888934856655e-08
PTGS2	62.5858714210526	14.7037062827536	-2.08965715654965	6.71895690671301e-07	2.6900227164999e-06
PRKCB	3.71747042631579	0.943156930896135	-1.97875152070971	5.67423037780951e-10	1.13818385813708e-08
S1PR1	14.4834644210526	4.48376212125604	-1.69162508856418	1.82955104741626e-08	1.26138293977004e-07
S1PR5	1.36744508842105	6.18389673710145	2.17703332752442	4.4198574287408e-06	1.47762020418131e-05
SGMS2	5.7947133	2.61114059487923	-1.15005714346793	0.000151770684067202	0.000352066688890584
SPHK1	3.01055133684211	8.61676084637681	1.51711792429211	0.0164451656885318	0.0248132809725192
UGCG	36.9939084736842	15.3685528478261	-1.26730640923112	3.91389200115466e-05	0.000106770973791499
